# Supplementary material
Source: PubMed Central journal article supplement (PMC3647928)
Supplement: JCM.03332-12_zjm999092438so2.pdf [file JCM.03332-12_zjm999092438so2.pdf]

**Supplementary Table 2.** Signature DNA pair sequences used for resistance gene search and plasmid replicon typing.

| Gene Description                                                                        | Primer labels                          | Sequence (5'-3')                                            | Function (Ambler Class)      | Reference |
|-----------------------------------------------------------------------------------------|----------------------------------------|-------------------------------------------------------------|------------------------------|-----------|
| <b>Beta-lactamases</b>                                                                  |                                        |                                                             |                              |           |
| <i>bla</i> CTX-M-1 group                                                                | CTX-M Gp1.F<br>CTX-M Gp1.R             | GGAATCTGACGCTGGGTAAA<br>GGTTGAGGCTGGGTGAAGTA                | ESBL<br>Ambler A             | (3)       |
| <i>bla</i> CTX-M-9 group                                                                | CTX-M Gp9.F<br>CTX-M Gp9.R             | GGTGATGAACGCTTTCCAAT<br>TCAATTTGTTTCATGGCGGTA               | ESBL<br>Ambler A             | (3)       |
| <i>bla</i> CTX-M group                                                                  | CTX-M-U1<br>CTX-M-U2                   | ATGTGCAGYACCAGTAARGTKATGGC<br>TGGGTRAARTARGTSACCAGAAYCAGCGG | ESBL<br>Ambler A             | (1)       |
| <i>bla</i> CTX-M group 1 including CTX-M-1, CTX-M-3 and CTX-M-15                        | MultiCTXMGp1 F<br>MultiCTXMGp1-2 R     | TTAGGAARTGTGCCGCTGYA<br>CGATATCGTTGGTGTRCCAT                | ESBL<br>Ambler A             | (2)       |
| <i>bla</i> CTX-M group 2 including CTX-M-2                                              | MultiCTXMGp2 F<br>MultiCTXMGp1-2 R     | CGTTAACGGCACGATGAC<br>CGATATCGTTGGTGTRCCAT                  | ESBL<br>Ambler A             | (2)       |
| <i>bla</i> CTX-M group 9 including CTX-M-9 and CTX-M-14                                 | MultiCTXMGp9 F<br>MultiCTXMGp9 R       | TCAAGCCTGCCGATCTGGT<br>TGATTCTCGCCGCTGAAG                   | ESBL<br>Ambler A             | (2)       |
| <i>bla</i> CTX-M group 8/25 (CTX-M-8, CTX-M-25, CTX-M-26 and CTX-M-39 to CTX-M-41)      | CTX-Mg8/25 F CTX-Mg8/25 R              | AACRCRCAGACGCTCTAC<br>TCGAGCCGGAASGTGYAT                    | ESBL<br>Ambler A             | (2)       |
| <i>bla</i> TEM                                                                          | TEM-164.SE<br>TEM-165.AS               | TCGCCGCATACACTATTCTCAGAATGA<br>ACGCTCACCGGCTCCAGATTTAT      | ESBL<br>Ambler A             | (10)      |
| <i>bla</i> TEM variants including TEM-1 and TEM-2                                       | MultiTSO-T F<br>MultiTSO-T R           | CATTTCGGTGTCCGCTTATTC<br>CGTTCATCCATAGTTGCTGAC              | ESBL<br>Ambler A             | (2)       |
| <i>bla</i> SHV                                                                          | <i>bla</i> SHV.SE<br><i>bla</i> SHV.AS | ATGCGTTATATTCGCTGTG<br>TGCTTTGTTATTCGGGCCAA                 | ESBL<br>Ambler A             | (11)      |
| <i>bla</i> SHV-5/12                                                                     | SHV-5/12.F<br>SHV-5/12.R               | AGCTGCTGCAGTGGATGGT<br>CAATGCGCTCTGCTTTGTTA                 | ESBL<br>Ambler A             | (3)       |
| <i>bla</i> SHV variants including SHV-1                                                 | MultiTSO-S F<br>MultiTSO-S R           | AGCCGCTTGAGCAAATTAAC<br>ATCCCCGAGATAAATCACCAC               | ESBL<br>Ambler A             | (2)       |
| <i>bla</i> VEB1                                                                         | VEB.F<br>VEB.R                         | CAAATGCACAAGGATTGGAA<br>ATTCCGGAAGTCCCTGTTTT                | ESBL<br>Ambler A             | (3)       |
| <i>bla</i> VEB-1 to VEB-6                                                               | MultiVEB F<br>MultiVEB R               | CATTTCCCGATGCAAAGCGT<br>CGAAGTTCTTTGGACTCTG                 | ESBL<br>Ambler A             | (2)       |
| <i>bla</i> GES-1 to GES-9 and GES-11                                                    | MultiGES F<br>MultiGES R               | AGTCGGCTAGACCCGAAAG<br>TTTGTCCTGTCTCAGGAT                   | ESBL<br>Ambler A             | (2)       |
| <i>bla</i> GES-1 to GES-9 and GES-11                                                    | MultiGES F<br>MultiGES R               | AGTCGGCTAGACCCGAAAG<br>TTTGTCCTGTCTCAGGAT                   | ESBL<br>Ambler A             | (2)       |
| <i>bla</i> PER-1 and PER-3                                                              | MultiPER F MultiPER R                  | GCTCCGATAATGAAAGCGT<br>TTCGGCTTGACTCGGCTGA                  | ESBL<br>Ambler A             | (2)       |
| <i>bla</i> KPC-1 to KPC-5                                                               | MultiKPC F MultiKPC R                  | CATTCAAGGGCTTTCTTGCTGC<br>ACGACGGCATAGTCATTTGC              | Carbapenemase<br>Ambler A    | (2)       |
| <i>bla</i> LAT-1 to LAT-3, BIL-1, CMY-2 to CMY-7, CMY-12 to CMY-18 and CMY-21 to CMY-23 | CITMF<br>CITMR                         | TGGCCAGAAGTACAGGCAAA<br>TTTCTCTGAACGTGGCTGGC                | Cephalosporinase<br>Ambler C | (13)      |
| <i>bla</i> LAT-1 to LAT-3, BIL-1, CMY-2 to CMY-7, CMY-12 to CMY-18 and CMY-21 to CMY-23 | MultiCaseCIT F<br>MultiCaseCIT R       | CGAAGAGGCAATGACCAGAC<br>ACGGACAGGGTTAGGATAGY                | Cephalosporinase<br>Ambler C | (2)       |
| <i>bla</i> FOX-1 to FOX-5                                                               | MultiCaseFOX F<br>MultiCaseFOX R       | CTACAGTGCGGGTGGTTT<br>CTATTTGCGGCCAGGTGA                    | Cephalosporinase<br>Ambler C | (2)       |
| <i>bla</i> MOX-1, MOX-2, CMY-1, CMY-8 to CMY-11 and CMY-19                              | MultiCaseMOX F<br>MultiCaseMOX R       | GCAACAACGACAATCCATCCT<br>GGGATAGGCGTAACTCCTCCAA             | Cephalosporinase<br>Ambler C | (2)       |
| <i>bla</i> DHA                                                                          | DHAMF<br>DHAMR                         | AACTTTCACAGGTGTGCTGGGT<br>CCGTACGCATACTGGCTTTGC             | Cephalosporinase<br>Ambler C | (13)      |

|                                                                                  |                                  |                                                  |                                 |     |
|----------------------------------------------------------------------------------|----------------------------------|--------------------------------------------------|---------------------------------|-----|
| <i>bla</i> DHA-1 and DHA-2                                                       | MultiCaseDHA F<br>MultiCaseDHA R | TGATGGCACAGCAGGATATTC<br>GCTTTGACTCTTTCCGGTATTCG | Cephalosporinase<br>Ambler C    | (2) |
| <i>bla</i> ACC-1 and ACC-2                                                       | MultiCaseACC F<br>MultiCaseACC R | CACCTCCAGCGACTTGTAC<br>GTTAGCCAGCATCCAGATCC      | Cephalosporinase<br>Ambler C    | (2) |
| <i>bla</i> ACT-1 and MIR-1                                                       | MultiCaseEBC F<br>MultiCaseEBC R | CGGTAAAGCCGATGTTGCG<br>AGCCTAACCCCTGATACA        | Cephalosporinase<br>Ambler C    | (2) |
| <i>bla</i> IMP                                                                   | imp-BE1<br>imp-BE2               | CAYGGTTTGGTGGTTCTTGTA<br>CCTTTAACVGCCTGYCTYMT    | Carbapenemase (MBL)<br>Ambler B | (5) |
| <i>bla</i> IMP variants except<br>IMP-9, IMP-16,<br>IMP-18, IMP-22 and<br>IMP-25 | MultiIMP F<br>MultiIMP R         | TTGACACTCCATTTACDG<br>GATYGAGAATTAAGCCACYCT      | Carbapenemase (MBL)<br>Ambler B | (2) |
| <i>bla</i> VIM                                                                   | Vim-F<br>Vim-R                   | GATGGTGTGGTTCGCATA<br>CGAATGCGCAGCACCAG          | Carbapenemase (MBL)<br>Ambler B | (4) |
| <i>bla</i> VIM variants<br>including VIM-1 and<br>VIM-2                          | MultiVIM F<br>MultiVIM R         | GATGGTGTGGTTCGCATA<br>CGAATGCGCAGCACCAG          | Carbapenemase (MBL)<br>Ambler B | (2) |
| <i>bla</i> NDM1                                                                  | NDM.F<br>NDM.R                   | CTCCAACGGTTTGATCGTC<br>ATTGGCATAAGTCGCAATCC      | Carbapenemase (MBL)<br>Ambler B | (3) |
| <i>bla</i> OXA-1, OXA-4 and<br>OXA-30                                            | MultiISO-O F<br>MultiISO-O R     | GGCACCAGATTCACCTTCAAG<br>GACCCAAAGTTCTGTAAGTG    | OXA beta-lactamase<br>Ambler D  | (2) |
| <i>bla</i> OXA-48-like                                                           | MultiOXA-48 F<br>MultiOXA-48 R   | GCTTGATCGCCCTGATT<br>GATTTGCTCCGTGGCCGAAA        | OXA carbapenemase<br>Ambler D   | (2) |

#### Non-beta-lactamases

| Gene Description | Primer labels                      | Sequence (5'-3')                                 | Gene Function                                                        | Reference |
|------------------|------------------------------------|--------------------------------------------------|----------------------------------------------------------------------|-----------|
| qnrA             | qnrAF<br>qnrAR                     | ATTTCTCACGCCAGGATTTG<br>GATCGGCAAAGGTTAGGTCA     | Quinolone resistance,<br>plasmid                                     | (8)       |
| qnrB             | qnrBF<br>qnrBR2                    | GATCGTGAAAGCCAGAAAGG<br>ATGAGCAACGATGCCTGGTA     | Quinolone resistance,<br>plasmid                                     | (8)       |
| qnrC             | qnrCF<br>qnrCR                     | GGGTTGTACATTTATTGAATCG<br>CACCTACCCATTTATTTCA    | Quinolone resistance,<br>plasmid                                     | (8)       |
| qnrS             | qnrSmF<br>qnrSmR                   | GCAAGTTCATTGAACAGGGT<br>TCTAAACCGTCGAGTTCGGCG    | Quinolone resistance,<br>plasmid                                     | (8)       |
| qep              | qepAF<br>qepAR                     | AACTGCTTAGCCCGTAGAT<br>GTCTACGCCATGGACCTCAC      | Quinolone efflux pump,<br>plasmid                                    | (8)       |
| gyrA             | gyrAWF<br>gyrAWR                   | AAATCTGCCGTGTCGTTGGT<br>GCCATACCTACGGCGATACC     | Quinolone resistance,<br>chromosomal<br>(topoisomerase II)           | (8)       |
| parC             | parCWF<br>parCWR                   | CTGAATGCCAGCGCCAAATT<br>GCGAACGATTTCCGGATCGTC    | Quinolone resistance,<br>chromosomal<br>(topoisomerase IV)           | (8)       |
| 3aac(6')-Ib      | aac6'-A<br>aac6'-B                 | TTGCGATGCTCTATGAGTGGCTA<br>CTCGAATGCCTGGCGTGT    | Aminoglycoside<br>acetyltransferase                                  | (9)       |
| aac(6')-Ib-cr    | aac(6')-Ib-cr F<br>aac(6')-Ib-cr R | GCAACGCAAAAACAAGTTAGG<br>GTGTTTGAACCATGTACA      | Aminoglycoside<br>acetyltransferase plus<br>ciprofloxacin resistance | (12)      |
| aac(6')-Ic       | aac6'-Ic (F)<br>aac6'-Ic (R)       | CTACGATTACGTCAACGGCTGC<br>TTGCTTCGCCACTCCTGCACC  | Aminoglycoside<br>acetyltransferase                                  | (7)       |
| aac(6')-Id       | aac6'-Id (F)<br>aac6'-Id (R)       | TGGCTGCAACTTCGTTTTCTCC<br>GGTGAAATCTATGGCTTCCG   | Aminoglycoside<br>acetyltransferase                                  | (7)       |
| aac(6')-Ie       | aac6'-Ie (F)<br>aac6'-Ie (R)       | ACATTATACAGAGCCTTGGG<br>CTCGTGTAAATTCATGTTCTGGC  | Aminoglycoside<br>acetyltransferase                                  | (7)       |
| aac(6')-Ig       | aac6'-Ig (F)<br>aac6'-Ig (R)       | CCTATTCCGATCACCAAGC<br>TTGTTTTGCCACACTTCG        | Aminoglycoside<br>acetyltransferase                                  | (7)       |
| aac(6')-Ih       | aac6'-Ih (F)<br>aac6'-Ih (R)       | ATTGGCTTATACCGACACC<br>GGCTGATCTGATTATCCAACGC    | Aminoglycoside<br>acetyltransferase                                  | (7)       |
| aac(6')-Ii       | aac6'-Ii (F)<br>aac6'-Ii (R)       | AAGAATATGGAGACGCTCGGC<br>ACAGGTCGTTTGACTTAACG    | Aminoglycoside<br>acetyltransferase                                  | (7)       |
| aac(6')-Ij       | aac6'-Ij (F)<br>aac6'-Ij (R)       | CATGACGAGGCACATTTACAGG<br>GGCTAATACGATTATCGAGGGC | Aminoglycoside<br>acetyltransferase                                  | (7)       |
| aac(6')-Il       | aac6'-Il (F)                       | TGCTTGGGAATATGTCTGG                              | Aminoglycoside                                                       | (7)       |

|               |                                             |                                                                                                              |                                                                                |      |
|---------------|---------------------------------------------|--------------------------------------------------------------------------------------------------------------|--------------------------------------------------------------------------------|------|
|               | aac6'-II (R)                                | TTGTTGGGCTGTTCTTCTAGC                                                                                        | acetyltransferase                                                              |      |
| aac(6')-Iib   | aac(6')-Iib (F)<br>aac(6')-Iib (R)          | CGCTTGTTGATTTGCTGTTGCG<br>TTGAAACGACCTTGACCTTCCG                                                             | Aminoglycoside<br>acetyltransferase                                            | (7)  |
| ant(3'')-Ia   | ant(3'')-Ia (F)<br>ant(3'')-Ia (R)          | TCGACTCAACTATCAGAGG<br>ACAATGGTGACTTCTACAGCG                                                                 | Aminoglycoside<br>acetyltransferase                                            | (7)  |
| armA          | armA F<br>armA R                            | AGGTTGTTTCCATTTCTGAG<br>TCTCTCCATTCCTTCTCC                                                                   | Aminoglycoside<br>resistance (16S rRNA<br>methylase)                           | (15) |
| rmtA          | rmtA F<br>rmtA R                            | CTAGCGTCCATCCTTCTC<br>TTGCTTCCATGCCCTTGCC                                                                    | Aminoglycoside<br>resistance (16S rRNA<br>methylase)                           | (15) |
| rmtB          | rmtB F<br>rmtB R                            | CCCAAACAGACCGTAGAGGC<br>CTCAAACCTGGCGGCAAGC                                                                  | Aminoglycoside<br>resistance (16S rRNA<br>methylase)                           | (15) |
| rmtC          | rmtC F<br>rmtC R                            | CGAAGAAGTAACAGCCAAAG<br>ATCCCAACATCTCTCCCACT                                                                 | Aminoglycoside<br>resistance (16S rRNA<br>methylase)                           | (15) |
| catA1         | CAT F<br>CAT R                              | AAGTTGGCAGCATTACCCG<br>TCGTGGTATTCACTCCAGAGCG                                                                | Chloramphenicol<br>resistance                                                  | (12) |
| tetA          | TetA F<br>TetA R                            | GGTCTTGCTCGTCTCGCTGG<br>AACGCCATCCATCCCGTG                                                                   | Tetracycline resistance                                                        | (12) |
| tetB          | TetB F<br>TetB R                            | CCTTATCATGCCAGTCTTGC<br>ACTGCCGTTTTTTCGCC                                                                    | Tetracycline resistance                                                        | (12) |
| tetC          | TetC F<br>TetC R                            | ACTTGGAGCCACTATCGAC<br>CTACAATCCATGCCAACCC                                                                   | Tetracycline resistance                                                        | (12) |
| tetD          | TetD F<br>TetD R                            | TGGGCAGATGGTCAGATAAG<br>CAGCACACCCTGTAGTTTTTC                                                                | Tetracycline resistance                                                        | (12) |
| tetE          | TetE F<br>TetE R                            | TTAATGGCAACAGCCAGC<br>TCCATACCCATCCATTCCAC                                                                   | Tetracycline resistance                                                        | (12) |
| tetY          | TetY F<br>TetY R                            | ACCGCACTCATTGTTGTC<br>TTCCAAGCAGCAACACAC                                                                     | Tetracycline resistance                                                        | (12) |
| aphA1-Ia      | Aph F<br>Aph R                              | AACGTCTTGCTCGAGGCCGCG<br>GGCAAGATCCTGGTATCGGTCTGC                                                            | Aminoglycoside<br>(neomycin/kanamycin)<br>resistance                           | (12) |
| aadB          | AadB F<br>AadB R                            | GGGCGCGTCATGGAGGAGTT<br>TATCGCGACCTGAAAGCGGC                                                                 | Adenyltransferase<br>Trimethoprim and low-<br>level streptomycin<br>resistance | (12) |
| strA          | StrA F<br>StrA R                            | CCAATCGCAGATAGAAGGCAAG<br>ATCAACTGGCAGGAGGAACAGG                                                             | Streptomycin resistance                                                        | (12) |
| dfrA1         | dfr1-F<br>dfr1-R                            | TGGTAGCTATATCGAAGAATGGAGT<br>TATGTTAGAGGCGAAGTCTTGGGTA                                                       | Dihydrofolate reductase<br>Trimethoprim resistance                             | (6)  |
| dfrA5         | dfr5-F<br>dfr5-R                            | AGTACTCTTTAAAGCCTTGACGTA<br>GTGTTGCTCAAAAACAACCTTCG                                                          | Dihydrofolate reductase<br>Trimethoprim resistance                             | (6)  |
| dfrA7, dfrA17 | dfr7/17-F<br>dfr7/17-R<br>dfr7-R<br>dfr17-R | ACATTTGACTCTATGGGTGTTCTTC<br>AAAACGTTCAAAACCAAATTGAA<br>ACCTCAACGTGAACAGTAGACAAAT<br>TCTCTGGCGGGGGTCAAATCTAT | Dihydrofolate reductase<br>Trimethoprim resistance                             | (6)  |
| dfrA12        | dfr12-F<br>dfr12-R                          | GAGCTGAGATATACTCTGGCACT<br>GTACGGAATTACAGCTTGAATGGT                                                          | Dihydrofolate reductase<br>Trimethoprim resistance                             | (6)  |
| sul1          | Sul1-F<br>Sul1-R                            | TGGTGACGGTGTTCGGCATTTC<br>GCGAGGGTTTCCGAGAAGGTG                                                              | Sulfonamide resistance                                                         | (14) |
| sul2          | Sul2-F<br>Sul2-R                            | CGGCATCGTCAACATAACC<br>GTGTGCGGATGAAGTCAG                                                                    | Sulfonamide resistance                                                         | (14) |
| sul3          | Sul3-F<br>Sul3-R                            | CATTCTAGAAAACAGTCGTAGTTCC<br>CATCTGCAGCTAACCTAGGGCTTTGGA                                                     | Sulfonamide resistance                                                         | (14) |

## References

1. **Boyd, D. A., S. Tyler, S. Christianson, A. McGeer, M. P. Muller, B. M. Willey, E. Bryce, M. Gardam, P. Nordmann, and M. R. Mulvey.** 2004. Complete nucleotide sequence of a 92-kilobase plasmid harboring the CTX-M-15 extended-spectrum beta-lactamase involved in an outbreak in long-term-care facilities in Toronto, Canada. *Antimicrobial agents and chemotherapy* **48**:3758-3764.
2. **Dallenne, C., A. Da Costa, D. Decre, C. Favier, and G. Arlet.** 2010. Development of a set of multiplex PCR assays for the detection of genes encoding important beta-lactamases in Enterobacteriaceae. *The Journal of antimicrobial chemotherapy* **65**:490-495.
3. **Ellem, J., S. R. Partridge, and J. R. Iredell.** 2011. Efficient direct extended-spectrum beta-lactamase detection by multiplex real-time PCR: accurate assignment of phenotype by use of a limited set of genetic markers. *Journal of clinical microbiology* **49**:3074-3077.
4. **Ellington, M. J., J. Kistler, D. M. Livermore, and N. Woodford.** 2007. Multiplex PCR for rapid detection of genes encoding acquired metallo-beta-lactamases. *The Journal of antimicrobial chemotherapy* **59**:321-322.
5. **Espedido, B. A., S. R. Partridge, and J. R. Iredell.** 2008. bla(IMP-4) in different genetic contexts in Enterobacteriaceae isolates from Australia. *Antimicrobial agents and chemotherapy* **52**:2984-2987.
6. **Grape, M., A. Motakefi, S. Pavuluri, and G. Kahlmeter.** 2007. Standard and real-time multiplex PCR methods for detection of trimethoprim resistance *df*r genes in large collections of bacteria. *Clinical microbiology and infection : the official publication of the European Society of Clinical Microbiology and Infectious Diseases* **13**:1112-1118.
7. **Hannecart-Pokorni, E., F. Depuydt, L. de wit, E. van Bossuyt, J. Content, and R. Vanhoof.** 1997. Characterization of the 6'-N-aminoglycoside acetyltransferase gene *aac(6')*-Im [corrected] associated with a *sulI*-type integron. *Antimicrobial agents and chemotherapy* **41**:314-318.
8. **Kim, H. B., C. H. Park, C. J. Kim, E. C. Kim, G. A. Jacoby, and D. C. Hooper.** 2009. Prevalence of plasmid-mediated quinolone resistance determinants over a 9-year period. *Antimicrobial agents and chemotherapy* **53**:639-645.
9. **Minarini, L. A., L. Poirel, V. Cattoir, A. L. Darini, and P. Nordmann.** 2008. Plasmid-mediated quinolone resistance determinants among enterobacterial isolates from outpatients in Brazil. *The Journal of antimicrobial chemotherapy* **62**:474-478.
10. **Monstein, H. J., A. Ostholm-Balkhed, M. V. Nilsson, M. Nilsson, K. Dornbusch, and L. E. Nilsson.** 2007. Multiplex PCR amplification assay for the detection of blaSHV, blaTEM and blaCTX-M genes in Enterobacteriaceae. *APMIS : acta pathologica, microbiologica, et immunologica Scandinavica* **115**:1400-1408.
11. **Paterson, D. L., K. M. Hujer, A. M. Hujer, B. Yeiser, M. D. Bonomo, L. B. Rice, R. A. Bonomo, and G. International Klebsiella Study.** 2003. Extended-spectrum beta-lactamases in *Klebsiella pneumoniae* bloodstream isolates from seven countries: dominance and widespread prevalence of SHV- and CTX-M-type beta-lactamases. *Antimicrobial agents and chemotherapy* **47**:3554-3560.

12. **Pazhani, G. P., S. Chakraborty, K. Fujihara, S. Yamasaki, A. Ghosh, G. B. Nair, and T. Ramamurthy.** 2011. QRDR mutations, efflux system & antimicrobial resistance genes in enterotoxigenic *Escherichia coli* isolated from an outbreak of diarrhoea in Ahmedabad, India. *The Indian journal of medical research* **134**:214-223.
13. **Perez-Perez, F. J., and N. D. Hanson.** 2002. Detection of plasmid-mediated AmpC beta-lactamase genes in clinical isolates by using multiplex PCR. *Journal of clinical microbiology* **40**:2153-2162.
14. **Saenz, Y., L. Brinas, E. Dominguez, J. Ruiz, M. Zarazaga, J. Vila, and C. Torres.** 2004. Mechanisms of resistance in multiple-antibiotic-resistant *Escherichia coli* strains of human, animal, and food origins. *Antimicrobial agents and chemotherapy* **48**:3996-4001.
15. **Shin, S. Y., K. C. Kwon, J. W. Park, J. H. Song, Y. H. Ko, J. Y. Sung, H. W. Shin, and S. H. Koo.** 2009. Characteristics of *aac(6')-Ib-cr* gene in extended-spectrum beta-lactamase-producing *Escherichia coli* and *Klebsiella pneumoniae* isolated from Chungnam area. *The Korean journal of laboratory medicine* **29**:541-550.
